24 **ABSTRACT**

25 **Background:** Work disability occurs when an injury, illness or other health condition limits  
26 the ability of a worker to participate in paid employment. Several lines of evidence suggest  
27 that people with work disability are also at increased risk of suicide and intentional self-harm,  
28 however the evidence on this relationship has not previously been the subject of systematic  
29 review.

30 **Objective:** This systematic scoping review aims to assess and summarise the research  
31 literature regarding the relationship between work disability and subsequent suicide or  
32 intentional self-harm.

33 **Methods:** Peer-reviewed quantitative and qualitative studies published in English from 1st  
34 January 2000 were included if they reported suicide or self-harm outcomes in people aged 15  
35 years or older with work disability. Narrative synthesis summarised findings according to the  
36 system of work disability income support.

37 **Results:** Literature search yielded 859 records of which 47 eligible studies were included,  
38 including nine set in workers' compensation, 20 in sickness absence, 13 in disability pension  
39 systems, and five from mixed cohorts. Of 44 quantitative studies, 41 reported a positive  
40 relationship between work disability and suicidal behaviour. The relationship is observed  
41 consistently across nations, work disability income support systems and in people with a  
42 range of health conditions. Several factors elevate risk of suicidal behaviour, including  
43 presence of mental health conditions and longer work disability duration. There were few  
44 quality studies in some nations and no suicide prevention interventions.

45 **Conclusion:** The risk of suicide and intentional self-harm is elevated in people experiencing  
46 work disability. While further observational research is required to fill evidence gaps, this  
47 review suggests the need for governments, employers and those involved in the delivery of

48 care and support to people with work disability to focus on identification and monitoring of  
49 those at greatest risk of suicidal behaviour, as well as suicide prevention.

50

51

52

53

54

55

56

57

58

59

60

61

62

63

64

65

66

67

68

## 69 INTRODUCTION

70 Work disability occurs when an injury, illness or other health condition limits the ability of a  
71 worker to participate in paid employment. Work disability is a broad concept, encompassing  
72 partial and temporary loss of work capacity, episodic changes in work capacity, through to  
73 total and permanent incapacity(1). Common diseases and illnesses of working age are the  
74 major causes of work disability, and include conditions with high prevalence such as low  
75 back pain, depression, anxiety and traumatic injury. The consequences of work disability can  
76 be significant for workers. People with prolonged work disability suffer worse mental  
77 health(2-4), have shorter life expectancy(5), attend healthcare consultations more frequently  
78 with physical symptoms and report higher levels of pain(6), receive more social care(7), and  
79 report reduced quality of life(8). There are also gaps in health service delivery. For example  
80 one study of disability pension recipients identified that although 69% reported a diagnosed  
81 mental health problem, only 16% reported receiving specialist mental health care(9), a  
82 finding reflected in similar studies of workers' compensation cohorts(2, 10).

83 In addition to treatment for the underlying health condition, people with work disability often  
84 require financial support for income losses incurred during periods of time away from work.  
85 In nations with developed economies, multiple forms of income support are often available.  
86 These can include sickness absence (i.e., sick leave) benefits for temporary work disability  
87 offered through employers and sometimes government agencies, and disability benefits for  
88 people with permanent or long-term work disability. Some nations also offer financial  
89 support through workers' compensation schemes where work is the cause of work disability.  
90 Provision of financial support for people with work disability is very common. For example,  
91 a recent study in the authors' country of Australia reported that for every 1000 working age  
92 Australians, an estimated 49.4 received income support for a period of work disability from a

93 government or private sector (i.e., not their employer) benefit scheme during the 2015/16  
94 year (11).

95 Several lines of evidence suggest that people with work disability are also at increased risk of  
96 suicide and intentional self-harm. First, work disability by definition results in a period of  
97 detachment from the workplace, and in some cases may result in unemployment.  
98 Unemployment both impairs mental health (12) and is associated with an increased risk of  
99 suicide, with the greatest risk within the first five years of unemployment (13). Second,  
100 several studies show that a substantial proportion of people with work disability have mental  
101 health conditions, including people in whom the episode of work disability is linked to a  
102 physical injury/condition. Approximately 30% to 50% of people with workers' compensation  
103 claims for musculoskeletal disorders reported moderate to severe psychological distress (2,  
104 3), while mental health conditions are now the most common medical condition among  
105 Australians receiving social assistance disability benefits (14). Third, people with work  
106 disability are often involved in administrative benefit systems such as workers' compensation  
107 or social assistance schemes. A large proportion of people experience the bureaucratic  
108 processes involved in eligibility determination and benefit delivery to be stressful (15, 16).  
109 Qualitative studies demonstrate that in some people, these administrative processes may lead  
110 to long-term mental health problems including suicidal ideation, and reduced quality of life  
111 (8, 17). Fourth, work disability is associated with financial distress. People receiving work  
112 disability benefits from workers' compensation and social assistance schemes report high  
113 levels of financial distress (18). Financial hardship is frequently cited as a risk factor for  
114 suicidal behaviour. Fifth, long periods of work disability are associated with changes in  
115 social support networks, including increasing the burden on caregivers and changing the  
116 nature of intimate relationships (19). Social support is a protective factor that reduces the risk  
117 of suicide death in adults (20) that may be adversely impacted during periods of work

118 disability. Finally, many people with work disability and concurrent mental health problems  
119 do not receive appropriate mental health treatment, and thus the risk of self-harm or future  
120 suicide is more likely to go unrecognised (2, 7).

121 Suicide and intentional self-harm are major public health problems that affect all ages,  
122 especially people of working age. In the author's home nation of Australia, suicide is the  
123 leading cause of death in those aged 15 to 44 years, and the third leading cause of premature  
124 death (21). There are more than 33,000 cases of hospitalisation for intentional self-harm  
125 annually, with the prevalence higher in younger people and females. People with work  
126 disability have multiple risk factors for suicide and suicidal behaviour, some of which are  
127 modifiable. While the existing evidence is highly suggestive of a link between work disability  
128 and later suicide and self-harm, the evidence-base is disaggregated. Studies have been  
129 conducted using a variety of methods, in multiple cultural and societal contexts, using a  
130 variety of key concept and outcome definitions, and across nations with very differing  
131 approaches to supporting people with work disability. There is a need for a scoping study to  
132 examine the relationship between work disability and subsequent suicide and self-harm.

133 The objective of this systematic scoping review is to assess and summarise the research  
134 literature regarding the relationship between work disability and subsequent suicide or  
135 deliberate self-harm. The review also seeks to answer the question "What personal,  
136 psychological, social, medical, environmental or other factors influence the relationship  
137 between work disability and subsequent suicide or deliberate self-harm?".

## 138 **MATERIALS AND METHODS**

139 This is a systematic scoping review based on the method outlined by Arskey and  
140 O'Malley(22)(22) and extended by Levac et al(23)(23). A protocol for this review was

141 published on the Open Science Foundation website on 29<sup>th</sup> April 2021 and is available via the  
142 following link: <https://osf.io/kh5qf/>

### 143 Eligibility Criteria

144 Peer-reviewed research studies published in English from 1st January 2000 were eligible for  
145 inclusion if they reported suicide or self-harm outcomes in people aged 15 years or older who  
146 experienced an episode or episodes of work disability. Work disability was defined as a  
147 complete or partial incapacity to work due to an injury, illness or medical condition that can  
148 be temporary or permanent, and resulted in receipt of a financial payment from a third party  
149 such as an employer, insurance provider or government agency for a period of absence from  
150 work. This could include, for example, a workers' compensation income support benefit, a  
151 disability benefit, or a sickness absence payment. Studies reporting samples with injury,  
152 illness or medical conditions that affect work capacity but that did not result in a period of  
153 work absence were excluded. Suicide and self-harm outcomes were defined as taking or  
154 attempting to take one's own life, intentionally harming oneself including suicide attempts,  
155 and suicidal thoughts or ideation. Studies that reported on death, injury or harm that arose  
156 from the acts of others, by illness or by accidental causes were excluded. No limits on  
157 settings or geographic locations were applied.

158 Consistent with the exploratory nature of the review, we included both qualitative and  
159 quantitative primary studies. For quantitative studies, experimental and quasi-experimental  
160 study designs including randomized controlled trials, non-randomized controlled trials,  
161 before and after studies and interrupted time-series studies were eligible for inclusion. In  
162 addition, analytical observational studies including prospective and retrospective cohort  
163 studies, case-control studies and analytical cross-sectional studies were considered eligible.  
164 Qualitative studies from a variety of theoretical and methodological approaches were eligible  
165 including phenomenological studies, grounded theory, ethnography, qualitative description

166 and action research studies. Case reports, opinion pieces, commentary and literature reviews  
167 were excluded from consideration.

### 168 Search Strategy

169 An initial limited search of PubMed was undertaken to identify articles on the topic. The text  
170 words contained in the titles and abstracts of relevant articles, and the index terms used to  
171 describe the articles were used to develop a full search strategy (Supplementary Table 1). The  
172 search strategy included a combination of population terms for work disability combined with  
173 Boolean OR operators, and outcome terms for suicide and self-harm combined with Boolean  
174 OR operators. These two categories were combined with AND operators in final searches.  
175 Search terms were purposefully broad with limited exclusions to ensure all relevant literature  
176 was captured. The search strategy, including all identified keywords and index terms, were  
177 adapted for each included database or information source, and strategies for each database  
178 were developed and refined iteratively. Final searches were conducted in Medline, Scopus  
179 and Pubmed on 13<sup>th</sup> May 2021.

180 Reference chaining was also conducted, with potentially relevant references identified by a  
181 single author (AC) and included in evidence screening. Forward citation searches of included  
182 studies were conducted using academic literature databases Scopus and Medline. Backward  
183 citation searches from reference lists of included studies were also conducted.

184 Finally, ten expert academic researchers from North America, Europe and Australia with  
185 publications relevant to the topic were contacted and invited to identify studies for inclusion  
186 in evidence screening. These topic experts were provided with a summary of the purpose of  
187 the review, research questions and the eligibility criteria to guide their recommendations.

188 An overview of the search and article selection process is provided in Figure 1.

### 189 Selection of sources of evidence



190 Records identified through database searching, through reference chaining and from expert  
191 recommendations were collated and uploaded into EndNote version 9.3 (Clarivate Analytics,  
192 PA, USA). Records were compared across data sources and duplicates removed. Article  
193 screening proceeded in two major steps. First, titles and abstracts for all records were  
194 assessed against the eligibility criteria by two independent reviewers. Records on which both  
195 reviewers agreed were excluded or progressed to the next stage. Disagreements between  
196 reviewer eligibility ratings, or records on which one or either reviewer could not reach an  
197 eligibility decision, were resolved initially through discussion. In cases where agreement  
198 could not be reached through discussion, a third reviewer was engaged to make a final  
199 decision.

200 Second, all records that passed the first phase screening were retrieved in full. The full text of  
201 documents was assessed by two reviewers independently against the eligibility criteria.  
202 Disagreements between reviewer eligibility ratings, or records on which one or either  
203 reviewer could not reach an eligibility decision, were resolved through discussion. Reasons  
204 for exclusion of sources of evidence at full text were recorded and are reported in the  
205 PRISMA-ScR flow diagram presented in Figure 1.

#### 206 Data extraction

207 Data was extracted from eligible records using a data extraction tool developed by the  
208 reviewers. The data extracted included specific details about the participants, concept,  
209 context, study methods and key findings relevant to the review question/s. Data fields  
210 extracted included study title, authors, journal, year of publication, country of origin, study  
211 aim/objective, methodological design, inception period, follow-up period, age distribution,  
212 sex/gender distribution, sample size, nature of health condition leading to work disability,  
213 type of work disability benefit system (workers' compensation, disability insurance, sickness  
214 absence), description of suicide or self-harm outcome/s, statistical analysis method,

215 covariates tested in statistical modelling, whether pre-existing health status was included in  
216 statistical adjustment, estimates of statistical effect size, the authors' conclusions regarding  
217 the relationship between work disability and outcomes tested, implications for policy and  
218 practice, and any gaps identified by study authors. For qualitative studies the major themes  
219 relating to suicide and self-harm were extracted and fields related to statistical analysis and  
220 effect size were not able to be extracted. Data extraction was initially completed on five  
221 eligible studies by a single reviewer (AC). Extracted data was then reviewed by a second  
222 reviewer to confirm that all relevant information was extracted. A single reviewer then  
223 completed data extraction on the remaining eligible studies.

#### 224 Evidence synthesis

225 A descriptive numerical summary of included studies was developed and presented in a  
226 tabular format for discussion amongst the authors. The synthesis tables described the  
227 numbers of studies by key study features including by study design, country of origin, nature  
228 of condition leading to work disability and type of disability benefit system. Inspection of the  
229 summary identified three distinct categories of evidence reflecting three unique contexts in  
230 which income support was provided to people with work disability, and also reflecting  
231 qualitatively different forms of work disability. First, there were a set of eligible studies set in  
232 cause-based workers' compensation systems, in which the injury or illness leading to work  
233 disability must be attributable to employment. Second, there were a set of eligible studies set  
234 in disability-based pension systems in which people typically have long-term or permanent  
235 work disability. A third set of eligible studies were set in sickness absence systems in which  
236 people typically have shorter or temporary periods of work disability. There was also a set of  
237 studies that included participants receiving either sickness absence or disability pension  
238 benefits and these were combined into a fourth category.

239 For each of these categories a narrative summary was developed, describing the relationship  
240 between work disability and suicide (study main objective), and any factors that contribute to  
241 or modify this relationship (key research question). Within each category, studies were  
242 grouped and counted according to the study outcome, design, the health condition leading to  
243 work disability, by country of origin and other features. Gaps in the current evidence base  
244 will also be identified and described in order to identify opportunities for future research.

## 245 **RESULTS**

246 The literature database search yielded 859 records, with an additional 24 records identified  
247 through reference chaining and expert recommendations. After removing duplicates, a total  
248 of 524 unique records proceeded to screening. Application of eligibility criteria in title and  
249 abstract screening removed 457 records. A further 18 were considered ineligible during full-  
250 text screening, and the remaining 47 records proceeded to data extraction and synthesis.

251 [Insert Figure 1 about here]

252 Figure 1. PRISMA flow chart

253 Of the included studies, 35 reported suicide outcomes, 18 intentional self-harm and a further  
254 8 included suicidal ideation, noting that some studies reported outcomes across multiple of  
255 these categories. A single study reported a composite outcome that incorporated suicide with  
256 intentional self-harm. In nine studies participants were involved in workers' compensation  
257 benefit systems, in 20 participants were receiving sickness absence benefits during their work  
258 disability, in 13 participants received disability pension benefits, and in a further five studies  
259 participants receiving either sickness absence or disability pension benefits were combined in  
260 the exposure group. Thirty-two of the eligible studies reported an objective of assessing the  
261 relationship between work disability and later suicide or self-harm. In the remaining 15

262 studies this relationship was reported in statistical analysis but was not an explicit objective  
263 of the study.

264 Methods were heterogenous, with 31 studies reporting either prospective or retrospective  
265 cohort designs, 6 case-control studies, 5 cross-sectional studies, 3 qualitative studies and a  
266 further 2 ecological studies. Thirty-five of the studies involved linkage of data between two  
267 separate data sources, and thirty-seven included data from more than one source. The most  
268 common data sources were administrative records (N=37, e.g., social security payment  
269 records, workers' compensation records) and electronic health records (N=32, e.g., hospital  
270 records), while 9 reported data collected via participant or healthcare provider surveys, and 3  
271 from participant interviews. Among the 44 quantitative studies, the primary statistical  
272 analysis methods included survival analysis (N=22), logistic regression (N=11), Poisson  
273 regression (N=2), linear regression (N=2) and calculation of standardised mortality ratio  
274 (N=3). A further 7 studies reported other primary analysis methods including trajectory  
275 modelling, cumulative risk estimate, relative risk, descriptive statistics and the chi-square  
276 statistic. The 3 qualitative studies reported results of thematic analysis.

277 The majority of included studies (N=28) did not focus on populations with specific health  
278 conditions. Eleven studies were conducted in samples with mental health conditions, a further  
279 four in samples with musculoskeletal disorders and four studies in samples with specific  
280 medical conditions. In 21 studies an indicator of health status prior to the onset of work  
281 disability was included as a confounder in the final statistical model. Forty of the eligible  
282 studies were in community-based samples, 4 in groups defined on the basis of their  
283 occupation, and 3 in groups defined on the basis of their medical/hospital admission status.  
284 Three studies were focused on young adults, one on middle aged adults and the remainder  
285 included samples across the working age spectrum.

286 Studies in workers' compensation benefit recipients

287 Nine eligible studies reported relevant outcomes in people with work disability who had  
288 received financial support from workers' compensation schemes. The studies are summarised  
289 in Table 1. Five of the studies reported suicide outcomes, four suicidal ideation and a single  
290 reported intentional self-harm. Studies were from five countries, including three from each of  
291 the United States and Canada, and one each from Australia, Korea and Taiwan. Eight of the  
292 studies included samples of people with musculoskeletal disorders (MSD), with three focused  
293 solely on this condition and five also including people with accepted workers' compensation  
294 claims for other conditions. A single study reported on people with traumatic injury and  
295 specifically excluded those with gradual onset MSD or intentional self-harm as the cause of  
296 work disability.

297

298 **Table 1. Summary of workers' compensation studies**

| Author (Year) & Location                              | Study Design & Follow-up period                | Data Sources                                          | Sample size & percent female                   | Sample definition (exposed group)                                                                      | Sample definition (comparator group)                                                                                    | Primary outcome/s                                                                                                                                                                                                   | Main finding                                                                                                                                                                                                                                                                                                                                                  |
|-------------------------------------------------------|------------------------------------------------|-------------------------------------------------------|------------------------------------------------|--------------------------------------------------------------------------------------------------------|-------------------------------------------------------------------------------------------------------------------------|---------------------------------------------------------------------------------------------------------------------------------------------------------------------------------------------------------------------|---------------------------------------------------------------------------------------------------------------------------------------------------------------------------------------------------------------------------------------------------------------------------------------------------------------------------------------------------------------|
| Applebaum et al (2019)<br><br>New Mexico, USA         | Prospective Cohort Study<br><br>13 to 18 years | Workers' compensation; Social security; Coronial data | N = 100,806<br><br>Female 38%                  | Adults (15 to 80 years) with injuries resulting in more than 7 days off work ("lost time injuries")    | Adults with injuries resulting in 7 or fewer days off work who received only medical benefits ("medical only" injuries) | Suicide<br>Defined using ICD-10 coding from national death index                                                                                                                                                    | "Lost-time injuries were associated with mortality related to suicide. Among women, lost time injuries were associated with a 92% increase in mortality hazard due to suicide. For men, lost time injury was associated with a 72% increased hazard of suicide."                                                                                              |
| Fishbain et al (2009)<br><br>United States of America | Cross sectional study<br><br>Not applicable    | Participant questionnaire                             | N = 2,264<br><br>Sex distribution not reported | Adult rehabilitation patients (18 to 65 years) with acute or chronic pain                              | Adult rehabilitation patients (18 to 65 years) with acute or chronic pain but no compensation claim                     | Suicidal ideation<br>1. History of wanting to die<br>2. Wanting to die because of pain<br>3. Recent frequent suicidal ideation<br>4. Has suicide plan<br><br>Intentional self-harm<br>5. History of suicide attempt | "Being a rehabilitation patient and having worker's compensation status increased the risk over just simply being a rehabilitation patient for all suicidality items, except "history of wanting to die."                                                                                                                                                     |
| Lee et al (2020)<br><br>Korea                         | Prospective Cohort Study<br><br>1 to 13 years  | Workers compensation; Death register                  | N = 775,537<br><br>Female 20.2%                | Adults aged 15 to 79 years with work-related injury, excluding those with MSD or intentional self-harm | National suicide mortality reference data                                                                               | Suicide<br>Defined using ICD-10 coding from national death register                                                                                                                                                 | "Overall, occupationally injured workers showed significantly higher mortality compared with the reference population.<br><br>We found that occupationally injured workers have a higher risk of suicide both in men and women. Contrary to our hypothesis, injured workers with disabilities had lower rates of suicide compared with non-disabled workers." |

|                                  |                                             |                                       |                                             |                                                                                                 |                                           |                                                                  |                                                                                                                                                                                                                                                                                                                                                                                                                                                                                                                                                                                                     |
|----------------------------------|---------------------------------------------|---------------------------------------|---------------------------------------------|-------------------------------------------------------------------------------------------------|-------------------------------------------|------------------------------------------------------------------|-----------------------------------------------------------------------------------------------------------------------------------------------------------------------------------------------------------------------------------------------------------------------------------------------------------------------------------------------------------------------------------------------------------------------------------------------------------------------------------------------------------------------------------------------------------------------------------------------------|
| Lin et al (2010)<br>Taiwan       | Retrospective Cohort Study<br>1 to 20 years | Death register; Workers' compensation | N = 71,001<br>Sex distribution not reported | Adults (age not stated) with upper or lower limb injury                                         | National suicide mortality reference data | Suicide Defined using ICD-10 coding from national death register | "In this study, lower extremity amputees were found to have about a 4-fold greater risk of intentional self-harm [resulting in death], and it corroborated previous reports suggesting that people with severe lower extremity injuries and/or amputations usually suffer considerable psychological distress often leading to alcohol addiction and substance abuse."                                                                                                                                                                                                                              |
| Lippel (2007)<br>Quebec, Canada  | Qualitative study<br>Not applicable         | Participant interviews                | N=85<br>Female 48%                          | Adults with workers' compensation claims                                                        | Not applicable                            | Suicidal ideation<br>Self-report via interview                   | "The fact that design and implementation practices of social security systems can affect the health of those they are meant to help is well known ...yet these issues are rarely discussed with regard to disability insurance systems and workers' compensation. This study confirms that they are just as relevant in this context and require attention of both researchers and policy makers."                                                                                                                                                                                                  |
| MacEachen et al (2007)<br>Canada | Qualitative study<br>Not applicable         | Participant interviews                | N=37<br>Female 62.2%                        | Adults aged 30 to 69 years with conditions including MSD, respiratory, brain injury and cancer. | Not applicable                            | Suicidal ideation<br>Self-report via interview                   | "Their emotional situation [of disabled workers] was often precarious. Workers with injuries who attended the peer support groups usually had personal and financial situations that had reached a critical point, leaving them feeling trapped in lives over which they had little control."<br><br>"Many of these workers were angry, depressed, or alienated from their former sources of support including their families."<br><br>"Several participants gave detailed accounts of how it would be easier to put an end to their dire financial and personal situations by committing suicide." |

|                                                 |                                                |                                                              |                              |                                                                                                                |                                                           |                                                                     |                                                                                                                                                                                                                                                                                                                                                                                                                                                                                                |
|-------------------------------------------------|------------------------------------------------|--------------------------------------------------------------|------------------------------|----------------------------------------------------------------------------------------------------------------|-----------------------------------------------------------|---------------------------------------------------------------------|------------------------------------------------------------------------------------------------------------------------------------------------------------------------------------------------------------------------------------------------------------------------------------------------------------------------------------------------------------------------------------------------------------------------------------------------------------------------------------------------|
| MacEachen et al (2010)<br><br>Ontario, Canada   | Qualitative study<br><br>Not applicable        | Participant interviews                                       | N=69<br><br>Female 45.8%     | Adults (age not specified) with conditions including MSD, respiratory, brain injury and cancer.                | Not applicable                                            | Suicidal ideation<br>Self-report via interview                      | "This study links workers' and providers' accounts of problematic [return to work] experiences to policies and procedures that seemed unable to facilitate the recognition and management of these issues. It provides an explanation for the poor health of workers with long-term workers' compensation claims in a confluence of seemingly mundane, but dysfunctional RTW processes, that can slow the course of a claim and accumulate to create a damaging 'toxic dose' to some workers." |
| Martin et al (2020)<br><br>West Virginia, USA   | Prospective Cohort Study<br><br>16 to 18 years | Workers' compensation;<br>Social security;<br>Death register | N=14,218<br><br>Female 37.1% | Adults (age not specified) with low back pain receiving time-loss benefits                                     | Adults with low back pain receiving medical benefits only | Suicide<br>Defined using ICD-10 coding from national death register | "Mortality from intentional self-harm were significantly associated with lost time [injuries] only. Hazard Ratios for intentional self-harm according to amount of lost time, permanent disability, percent permanent disability, and surgical treatment were also elevated, but were not statistically significant."                                                                                                                                                                          |
| Routley et al (2012)<br><br>Victoria, Australia | Retrospective cohort study<br><br>Not reported | Coronial records                                             | N=62<br><br>Female 16.2%     | Adults aged 25 years and over completing suicide (injury and illness leading to work disability not specified) | None                                                      | Suicide<br>Defined using coronial records                           | "At least 22 of the suicides were in receipt of benefits from, or under investigation by, compensation agencies at the time of their suicide, and this was frequently implicated within case reports as being a significant source of stress for them. Stress attributable to involvement in legal processes is also indicated in the literature as being a contributory factor to suicide in both acute and chronic post-injury phases."                                                      |



299 Three of the studies were retrospective cohorts involving analysis of administrative data such  
300 as workers' compensation claims records, death registry data and social security data. A  
301 single study used electronic health records. There were a further two prospective cohort  
302 studies using administrative data. Four of the cohort studies had follow-up periods exceeding  
303 5 years, and the follow-up period in the fifth study was not stated. There was a single cross-  
304 sectional study using survey data, and three qualitative studies involving interviews with  
305 injured workers. Four studies involved linkage of data sources (e.g., workers' compensation  
306 records and death registry data) and the remainder reported data from a single source.

307 Two studies from the USA state-based workers' compensation schemes report greater risk of  
308 suicide among injured workers with compensation claims involving time off work compared  
309 with workers whose claims were for medical expenses only (24, 25). Applebaum et al (24)  
310 reported a retrospective cohort study of 100,806 adults with illness and injury acquired in the  
311 course of work between 1994 and 2000. Over a median 16 years follow-up period, those with  
312 at least 7 calendar days of lost time following their injury demonstrated a 92% and 72%  
313 increase in mortality hazard due to suicide for women and men, respectively. In a similar  
314 study, Martin et al (25) reported an 85% increase in suicide mortality hazard among workers  
315 with low back pain during a study with an 18-year follow-up period, among workers injured  
316 in 1998 or 1999. One Korean and one Taiwanese study reported an approximate doubling of  
317 suicide rates among adults with workers' compensation claims following musculoskeletal  
318 conditions (26) or traumatic injury (27) compared with national suicide mortality reference  
319 data. A single cross-sectional study of rehabilitation patients with chronic or acute pain  
320 conditions receiving workers' compensation reported significantly higher relative risk of  
321 suicidal ideation compared to similar patients not receiving workers' compensation (28). For  
322 example, the relative risk (RR) of "wanting to die because of pain" was 4.22 (2.67,6.68). An

323 Australian death register study identified that 29% of workers who had died by suicide in the  
324 state of Victoria were involved in a workers' compensation claim (29).

325 The literature search identified three qualitative studies in which workers reported suicidal  
326 thoughts (17, 30, 31). These were all conducted in Canadian workers' compensation settings.  
327 The author of one study reports a surprisingly high frequency of discussions of suicide among  
328 included workers, and also that other participants in workers compensation such as lawyers  
329 also report suicide risk among their workers clients. Workers involved in these studies link  
330 suicidal thoughts to their experiences of prolonged and serious disability, precarious personal  
331 and financial situations, and also to procedures, policies and attitudes of compensation  
332 agencies such as conducting surveillance and complex and dysfunctional administrative  
333 processes.

334 Some notable gaps in this literature include a small number of studies with longitudinal  
335 designs, undertaken in a small number of jurisdictions; and the lack of studies on workers  
336 with mental health condition claims.

### 337 Studies in sickness absence benefit recipients

338 Twenty eligible studies reported relevant outcomes in people with work disability who had  
339 received sickness absence benefits. The studies are summarised in Table 2. Fifteen studies  
340 reported suicide outcomes, seven intentional self-harm, 2 suicidal ideation and a single  
341 reported a composite outcome including suicide, self-harm and ideation. Studies were from  
342 eight countries, including eleven from Sweden, three from Norway and a single study from  
343 each of Finland, Japan, France, Spain, Slovenia and Brazil. Thirteen studies did not specify a  
344 specific condition and included samples of people with sickness absence from diverse causes,  
345 six studies included samples of people with Mental Health Conditions (MHC) and one an  
346 MSD sample.

**Table 2. Summary of sickness absence studies**

| Author (Year) & Location                        | Study Design & Follow-up period              | Data sources                                                                                  | Sample size & Percent female                    | Study (Exposure) Group                                                                                     | Comparison Group                                                                           | Primary outcome/s                                                                                                | Main finding                                                                                                                                                                                                                                                          |
|-------------------------------------------------|----------------------------------------------|-----------------------------------------------------------------------------------------------|-------------------------------------------------|------------------------------------------------------------------------------------------------------------|--------------------------------------------------------------------------------------------|------------------------------------------------------------------------------------------------------------------|-----------------------------------------------------------------------------------------------------------------------------------------------------------------------------------------------------------------------------------------------------------------------|
| Ando et al (2013)<br><br>Tokyo, Japan           | Cross sectional study<br><br>Not applicable  | Participant questionnaire;<br>Health practitioner questionnaire                               | N = 189<br><br>Female 45.2%                     | Adults (>19 years) receiving outpatient treatment for depression                                           | None                                                                                       | Suicidal ideation<br><br>As reported by treating psychiatrists                                                   | This study showed that taking sick-leave was associated with <b>decreased odds</b> of current suicidal ideation in people receiving outpatient treatment for depression.                                                                                              |
| Billingsley et al (2020)<br>Sweden              | Prospective Cohort Study<br><br>15 years     | Social security;<br>Death register;<br>Hospital records;<br>Social / labour market statistics | N = 27,178,226 person years<br><br>Female 58.1% | Adults (<66 years) who received 1 or more days of paid sickness absence benefit payments in 1996.          | Adults (<66 years) who did not receive any sickness absence benefit payments in 1996.      | Suicide<br><br>Based on ICD-10 codes in Death Register                                                           | This study shows a gradient in the relationship between sickness absence and suicide mortality. In both men and women, longer durations of sickness absence were associated with a higher hazard ratio for suicide.                                                   |
| Bjorkenstam et al (2014)<br>Sweden              | Prospective Cohort Study<br><br>11 years     | Social security;<br>Death register;<br>Hospital records;<br>Social / labour market statistics | N = 4,669,235<br><br>Female 48.7%               | Adults (20 to 64 years) who received 1 or more days of sickness absence benefit payments in 1995.          | Adults (20 to 64 years) who did not receive any sickness absence benefit payments in 1995. | Suicide<br><br>"Cause-specific mortality" derived from Death Register                                            | This study shows that sick leave was associated with a higher risk of suicide in both women and men. The relative risk for suicide increased in a graded fashion with more sick-leave days. Adjusting for prior inpatient care decreased the estimates significantly. |
| Braquehais et al (2020)<br><br>Catalonia, Spain | Prospective Cohort Study<br><br>Not reported | Electronic medical records                                                                    | N = 1214<br><br>Female 70.7%                    | Physicians and nurses (age range not stated) with mental health conditions enrolled in a treatment program | None                                                                                       | Suicidal ideation<br><br>High risk of suicide identified using the Mini International Neuropsychiatric Interview | This study observed that physicians and nurses with a high risk of suicide were more frequently on sick leave when admitted to the treatment programme.                                                                                                               |

|                                      |                                          |                                                                                      |                                                                                                |                                                                                                                                                                        |                                                                                                      |                                                                                                                                |                                                                                                                                                                                                                                                                                                                                                            |
|--------------------------------------|------------------------------------------|--------------------------------------------------------------------------------------|------------------------------------------------------------------------------------------------|------------------------------------------------------------------------------------------------------------------------------------------------------------------------|------------------------------------------------------------------------------------------------------|--------------------------------------------------------------------------------------------------------------------------------|------------------------------------------------------------------------------------------------------------------------------------------------------------------------------------------------------------------------------------------------------------------------------------------------------------------------------------------------------------|
| Bryngelson et al (2013)<br>Sweden    | Prospective Cohort Study<br>8 years      | Social security; Death register; Hospital records; Social / labour market statistics | N Cohort 1 (1990) = 244,990<br>Female 70.7%<br><br>N Cohort 2 (2000) = 764,137<br>Female 77.1% | People (16 to 60 years) with psychiatric disorders and at least one long spell of sickness absence exceeding 90 days, beginning in 1990 (Cohort 1) or 2000 (Cohort 2). | Employed people (16 to 60 years) with no registered sick leave in 1990 (Cohort 1) or 2000 (Cohort 2) | Suicide<br>Based on ICD-10 codes in Death Register                                                                             | Employees with long-term sickness absence due to a psychiatric disorder were at increased risk of suicide mortality compared to the reference group. This elevated risk remained after controlling for prior inpatient care.                                                                                                                               |
| Dorner et al (2017)<br>Sweden        | Prospective Cohort Study<br>4 years      | Social security; Death register; Hospital records; Social / labour market statistics | N = 66,097<br>Female 69.2%                                                                     | Adults (18 to 59 years) with new sickness absence spells due to common mental health conditions during 2006.                                                           | None                                                                                                 | Intentional self-harm<br>Based on ICD-10 codes from hospital records                                                           | Among people with sickness absence due to mental health conditions, a history of specialised outpatient care due to mental disorders, inpatient care regardless of diagnosis, and having been prescribed medication were associated with a higher risk of future suicide attempt.                                                                          |
| Ishtiak-Ahmed et al (2013)<br>Sweden | Prospective Cohort Study<br>3 to 4 years | Social security; Death register; Hospital records; Social / labour market statistics | N = 36,304<br>Female 72.5%                                                                     | People (16 to 64 years) with at least one sickness absence spell due to a stress-related mental health condition in 2005                                               | None                                                                                                 | Suicide<br>Based on ICD-10 codes in Death Register<br><br>Intentional self-harm<br>Based on ICD-10 codes from Hospital Records | Young age, low education, being a single parent, higher numbers of days and spells of sickness absence, and inpatient and outpatient care were predictive of suicide attempt.<br><br>Previous and on-going inpatient and outpatient care due to mental diagnoses and having two compared with only one sickness absence spell predicted suicide mortality. |

|                                                     |                                                    |                                                                                      |                                                                                      |                                                                                                                              |                                                                                                                   |                                                                                                                                |                                                                                                                                                                                                                                                                                                                                                                                                                                                                                                                                 |
|-----------------------------------------------------|----------------------------------------------------|--------------------------------------------------------------------------------------|--------------------------------------------------------------------------------------|------------------------------------------------------------------------------------------------------------------------------|-------------------------------------------------------------------------------------------------------------------|--------------------------------------------------------------------------------------------------------------------------------|---------------------------------------------------------------------------------------------------------------------------------------------------------------------------------------------------------------------------------------------------------------------------------------------------------------------------------------------------------------------------------------------------------------------------------------------------------------------------------------------------------------------------------|
| Jansson et al (2012)<br>Sweden                      | Prospective Cohort Study<br>3 years                | Social security; Death register; Hospital records; Social / labour market statistics | N = 4,760,987<br>Female 48.2%                                                        | Adults (20 to 64 years) who received payment for at least 1 sickness absence day due to a musculoskeletal diagnoses in 2005. | Adults (20 to 64 years) who did not receive any sickness absence benefits in 2005.                                | Suicide<br>Based on ICD-10 codes in Death Register                                                                             | Increased risks of suicide among people with sickness absence due to musculoskeletal disorders. The increased risk was higher for people with dorsopathies than for people with arthropathies and connective tissue diseases, or for people with soft tissue disorders, osteopathies and chondropathies.<br><br>This study also observed stronger associations between sickness absence due to non-musculoskeletal conditions and suicide mortality.                                                                            |
| Leira et al (2020)<br>North-Trondela County, Norway | Prospective Case Control Study<br>19 years         | Death register; Participant survey; Hospital records                                 | N = 66,140<br>Female 53.8%                                                           | Adults (20+ years) with a record of hospitalisation for self-harm or completing suicide between 1995 and 2014.               | Adults (20+ years) without a record of hospitalisation for self-harm or completing suicide between 1995 and 2014. | Suicide<br>Based on ICD-10 codes in Death Register<br><br>Intentional self-harm<br>Based on ICD-10 codes from Hospital Records | This study observed that sickness absence during the previous 12 months was almost twice as high in people who were hospitalised following intentional self-harm than in people who had completed suicide and the group without a record of hospitalisation or suicide.                                                                                                                                                                                                                                                         |
| Lunde et al (2020)<br>Norway                        | Retrospective Case control Study<br>not applicable | Death register; Hospital records; Social security                                    | N = 9,853 cases<br>Female 45.6%<br><br>N = 186,092 controls<br>Female % not reported | Young adults (18 to 35 years) hospitalised for deliberate self harm between 2008 and 2013.                                   | Community controls matched on age and gender and without a record of hospitalisation for deliberate self-harm.    | Intentional self-harm<br><br>Based on ICD-10 codes from hospital records                                                       | A prior spell of sickness absence was observed to be a statistically significant risk factor for later hospitalisation due to intentional self-harm, if the sickness absence was due to a psychiatric disorder.<br><br>The risk of hospitalisation for intentional self-harm was greater for people currently sickness absent, regardless of cause, but was greater if the sickness absence was due to a psychiatric disorder. There was a small additional increase in risk for those who had had 3 or more sick leave spells. |

|                                          |                                          |                                                         |                                      |                                                                                                                                               |                                                                                                             |                                                        |                                                                                                                                                                                                                                                                                                                                                                                                                                                     |
|------------------------------------------|------------------------------------------|---------------------------------------------------------|--------------------------------------|-----------------------------------------------------------------------------------------------------------------------------------------------|-------------------------------------------------------------------------------------------------------------|--------------------------------------------------------|-----------------------------------------------------------------------------------------------------------------------------------------------------------------------------------------------------------------------------------------------------------------------------------------------------------------------------------------------------------------------------------------------------------------------------------------------------|
| Lundin et al (2012)<br>Sweden            | Prospective Cohort Study<br>2 to 4 years | Death register;<br>Social security;<br>Census data      | N = 771,068<br><br>Female<br>49.8%   | Adult (aged 25 to 58 years) residents of Stockholm County in 1990-1991                                                                        | None                                                                                                        | Suicide<br><br>Based on ICD-10 codes in Death Register | For both men and women, longer durations of sickness absence were associated with statistically higher odds of suicide. This effect was stronger in men than in women, and for people with sickness absence exceeding 62 days.<br><br>Adjusting for unemployment had very little effect on the association between sickness absence and suicide. Thus, unemployment was not on the causal pathway (had no mediating effect) in either men or women. |
| Melchior et al (2010)<br>France          | Prospective Cohort Study<br>16 years     | Death register;<br>Employer records                     | N = 19,962<br><br>Female<br>26.8%    | Employees (35 to 50 years) of a gas and electricity company with medically certified sick-leave spells exceeding 7 days between 1990 and 1992 | Employees (35 to 50 years) of a gas and electricity company without sick-leave spells between 1990 and 1992 | Suicide<br><br>Based on ICD-10 codes in Death Register | This study observed that workers with sickness absence due to a psychiatric disorder were at increased risk of death from suicide.<br><br>Study participants who were sickness absent for at least 7 days due to a psychiatric disorder had a 6-fold excess risk of suicide.                                                                                                                                                                        |
| Mittendorfer-Rutz et al (2012)<br>Sweden | Prospective cohort study<br>3 to 4 years | Social security;<br>Death register;<br>Hospital records | N = 4,857,943<br><br>Female<br>47.5% | People (16 to 64 years) with at least one new sick-leave spell during 2005                                                                    | People (16 to 64 years) without a sick-leave spell during 2005                                              | Suicide<br><br>Based on ICD-10 codes in Death Register | The risk of suicide was increased nine-fold in people with a new sick-leave spell due to a mental health condition, after adjusting for age and sex. This risk estimate remained three-fold increased after controlling for a broader range of socio-demographic factors and prior health service use.                                                                                                                                              |

|                                 |                                                    |                                                                                                        |                                                                                      |                                                                                                                                                                   |                                                                                                |                                                                                                   |                                                                                                                                                                                                                                                                                                                                                                                                                                                                                                                                                                    |
|---------------------------------|----------------------------------------------------|--------------------------------------------------------------------------------------------------------|--------------------------------------------------------------------------------------|-------------------------------------------------------------------------------------------------------------------------------------------------------------------|------------------------------------------------------------------------------------------------|---------------------------------------------------------------------------------------------------|--------------------------------------------------------------------------------------------------------------------------------------------------------------------------------------------------------------------------------------------------------------------------------------------------------------------------------------------------------------------------------------------------------------------------------------------------------------------------------------------------------------------------------------------------------------------|
| Roskar et al (2020)<br>Slovenia | Ecological study<br>Not applicable                 | Death register;<br>Social / labour market statistics;<br>Participant questionnaire;<br>Social security | 212 municipalities                                                                   | Population of Slovenia<br><br>The exposure variable was the number of sick leave days per capita (at area level) in general and due to a mental health condition. | Not applicable                                                                                 | Suicide<br><br>Based on ICD-10 codes in Death Register                                            | This study observed that the number of sickness absence days per capita was statistically associated to the rate of suicide in local areas in a univariate analysis, but not in multivariate analysis adjusting for socio-economic, behavioural and health service characteristics.                                                                                                                                                                                                                                                                                |
| Szlejf et al (2020)<br>Brazil   | Cross sectional study<br>Not applicable            | Employer records                                                                                       | N = 16,890<br><br>Female 69.8%                                                       | Employees (18 + years) of a health organisation with sick leave spells during 2017 or 2018.                                                                       | Employees (18 + years) of a health organisation with no sick leave spells during 2017 or 2018. | Composite outcome<br><br>Suicide, suicidal ideation or self-harm based on employee health records | Employees with sickness absence from any cause had around 7 times higher odds of the composite outcome than employees without any sickness absence spell, after adjusting for age, sex, education and job position.<br><br>This effect was strongest among employees with sickness absence due to mental health conditions, and was also elevated among employees with more than 14 days of sickness absence.                                                                                                                                                      |
| Tang et al (2019)<br>Norway     | Retrospective Case Control Study<br>Not applicable | Death register;<br>Social security;<br>Social / labour market statistics                               | N = 9,313 Cases<br>Female 27.3%<br><br>N = 169,235 Controls<br>Female % not reported | Adults (18 to 66 years) completing suicide between 1992 and 2012                                                                                                  | Community controls matched on aged and gender                                                  | Suicide<br><br>Based on ICD-10 codes in Death Register                                            | Among males, a history of physical illness resulting in sickness absence was associated with significantly greater odds of subsequent suicide. The odds of suicide increased with a greater number of sickness absence spells, and longer durations of sickness absence. Effects remained significant when statistical models were adjusted for history of mental illness and socioeconomic status.<br><br>Among females the opposite was observed. A history of sickness absence due to physical illness, multiple sickness absence spells and longer duration of |

|                                 |                                          |                                                                                               |                                   |                                                                                                                     |                                                                    |                                                                                                                                |                                                                                                                                                                                                                                                                                                                                                                                                                                                                                                                                                                                                                                                                                                                                          |
|---------------------------------|------------------------------------------|-----------------------------------------------------------------------------------------------|-----------------------------------|---------------------------------------------------------------------------------------------------------------------|--------------------------------------------------------------------|--------------------------------------------------------------------------------------------------------------------------------|------------------------------------------------------------------------------------------------------------------------------------------------------------------------------------------------------------------------------------------------------------------------------------------------------------------------------------------------------------------------------------------------------------------------------------------------------------------------------------------------------------------------------------------------------------------------------------------------------------------------------------------------------------------------------------------------------------------------------------------|
|                                 |                                          |                                                                                               |                                   |                                                                                                                     |                                                                    |                                                                                                                                | sickness absence were all associated with a significantly reduced odds of subsequent suicide.                                                                                                                                                                                                                                                                                                                                                                                                                                                                                                                                                                                                                                            |
| Vahtera et al (2004)<br>Finland | Prospective Cohort Study<br>1 to 6 years | Death register;<br>Employer records                                                           | N = 41,736<br><br>Female 69.3%    | Municipal employees (18 + years) with a job contract lasting at least five consecutive years between 1990 and 2000. | None                                                               | Suicide<br><br>Based on ICD-10 codes in Death Register                                                                         | This study found that employees with more than one long sickness absence spell (exceeding 3 days) per annum had more than 7 times higher mortality from suicide. Shorter term absences of 1 to 3 days were not significantly associated with suicide.<br><br>Employees with more than 15 days sickness absence per annum had more than 3 times greater odds of suicide.                                                                                                                                                                                                                                                                                                                                                                  |
| Wang et al (2013)<br>Sweden     | Prospective Cohort Study<br>6 years      | Social security;<br>Death register;<br>Hospital records;<br>Social / labour market statistics | N = 4,923,404<br><br>Female 47.5% | People (16 to 64 years) with at least one new sick-leave spell during 2005                                          | People (16 to 64 years) without a new sick-leave spell during 2005 | Suicide<br>Based on ICD-10 codes in Death Register<br><br>Intentional self-harm<br>Based on ICD-10 codes from Hospital Records | Women and men with sickness absence showed a twofold increase in hazard ratio of both intentional self-harm and suicide compared with people without any sickness absence. The association increased with increasing sickness absence duration.<br><br>Sickness absence resulting from mental health conditions was most strongly associated with both suicide and intentional self-harm among both women and men.<br><br>Other specific sickness absence diagnoses associated with intentional self-harm included injury/poisoning, musculoskeletal, digestive, circulatory, nervous and respiratory diseases. For suicide, individuals with sickness absence due to musculoskeletal disorders and injury/poisoning had increased risk. |



|                             |                                     |                                                                                      |                                                                                                    |                                                                                                          |                                                                                                |                                                                                                                          |                                                                                                                                                                                                                                                                                                       |
|-----------------------------|-------------------------------------|--------------------------------------------------------------------------------------|----------------------------------------------------------------------------------------------------|----------------------------------------------------------------------------------------------------------|------------------------------------------------------------------------------------------------|--------------------------------------------------------------------------------------------------------------------------|-------------------------------------------------------------------------------------------------------------------------------------------------------------------------------------------------------------------------------------------------------------------------------------------------------|
| Wang et al (2015)<br>Sweden | Prospective Cohort Study<br>6 years | Social security; Death register; Hospital records; Social / labour market statistics | N = 21,096<br>Female 59.9%                                                                         | People (16 to 64 years) with depression who received psychiatric in or outpatient care during 2005       | None                                                                                           | Suicide Based on ICD-10 codes in Death Register<br><br>Intentional self-harm Based on ICD-10 codes from Hospital Records | Among patients with depressive disorders, significantly elevated risk of intentional self-harm was associated with new sickness absence spells, full time sickness absence, long sick-leave length, one or more sickness absence spells, as well as sickness absence due to mental health conditions. |
| Wang et al (2016)<br>Sweden | Prospective Cohort Study<br>2 years | Social security; Death register; Hospital records; Social / labour market statistics | N Cohort 1 (2006) = 4,071,935<br>Female 46.1%<br><br>N Cohort 2 (2009) = 4,176,873<br>Female 46.8% | People (16 to 64 years) with at least one new sick-leave spell during 2006 (Cohort 1) or 2009 (Cohort 2) | People (16 to 64 years) with no new sick-leave spell during 2006 (Cohort 1) or 2009 (Cohort 2) | Suicide Based on ICD-10 codes in Death Register<br><br>Intentional self-harm Based on ICD-10 codes from Hospital Records | This study observed that sickness absence due to any cause, and absence due to common mental health conditions were associated with both suicide and intentional self-harm. In addition, longer sickness absence duration was associated with intentional self-harm.                                  |

348 Eleven prospective cohort studies and a further two retrospective cohort studies involved  
349 analysis of linked datasets such as social security records, death registry data and hospital  
350 records. A further two prospective cohort studies involved linkage of employer records with  
351 death registry data. Two cross-sectional studies involved collection and analysis of  
352 participant questionnaire and employer records. There were three case-control studies and  
353 these also involved analysis of multiple linked data sources. Finally, a single ecological study  
354 examined municipal level data from multiple, unlinked sources. Among the longitudinal  
355 studies, follow-up periods ranged from 2 to 19 years, with 6 studies having follow-up periods  
356 longer than 5 years. Overall, these studies demonstrate an elevated risk of suicide and self-  
357 harm among people with a sickness absence spell. Nineteen of the 20 eligible studies  
358 observed positive associations between sickness absence and later suicide or self-harm.

359 Eight prospective or retrospective cohort studies showed a higher rate of suicide during  
360 follow-up among people with a sickness absence spell during the study inception period,  
361 compared to those without sickness absence (32-39). Multiple of these studies observed that  
362 people with longer sickness absence spells, and those with multiple spells, are at increased  
363 risk of suicide than those with short or no absences (32, 33, 36, 38), and that those whose  
364 absence is due to mental health conditions are at increased risk of suicide (34-38). Two of  
365 these cohort studies observed similar associations between mental health related sickness  
366 absence, and sick leave duration, and intentional self-harm (38, 39), while other studies also  
367 observed that there was increased rate of suicide or intentional self-harm in people with  
368 sickness absence due to musculoskeletal disorders (38) (35) or other conditions including  
369 injury/poisoning, digestive, circulatory, nervous and respiratory disease (38).

370 Three retrospective case-control studies observed that a prior sickness absence spell was a  
371 significant risk factor for hospitalisation for self-harm or suicide (40-42), although this effect  
372 was only significant among males in one of these studies (42). Two studies identified

373 predictors of suicide or self-harm among cohorts of people with sickness absence as  
374 including absence due to mental health conditions, a history of healthcare due to mental  
375 illness, young age, low education, being a single parent and having a high number of sickness  
376 absence days (43, 44). One study identified predictors of suicide among adult residents of  
377 Stockholm as including longer duration of sickness absence, with a stronger effect in men  
378 than women (45). Another study of people receiving healthcare for depression during 2005  
379 identified elevated risk of later self-harm resulting in hospitalisation among people with new,  
380 full-time or long sickness absence spells (46). Three studies were conducted in specific  
381 occupational cohorts. These identified that physicians and nurses with a high risk of suicide  
382 were more frequently on sick leave when admitted to an inpatient treatment program (47);  
383 that government employees with more than one sickness absence spell exceeding 3 days had  
384 more than 7 times higher mortality from suicide, while employees with more than 15 days  
385 sickness absence per annum had 3 times the odds of suicide (48); and that employees of a  
386 healthcare organisation with sick leave during 2017 or 2018 had seven times the odds of  
387 recording a composite outcome encompassing suicide, self-harm or suicidal ideation, than  
388 employees with no sick leave spells (49).

389 A single population based ecological study in Slovenia observed a univariate relationship  
390 between sickness absence duration per capita and the rate of suicide at a local area level,  
391 however this effect was not observed in statistical models that adjusted for area level  
392 socioeconomic and health service characteristics (50). Finally, a single cross-sectional study  
393 reported that taking sick leave was associated with decreased odds of current suicidal ideation  
394 in people receiving outpatient treatment for depression (51).

395 Some notable gaps in this literature include relatively few (N=5) studies outside Nordic  
396 countries and no studies in North America or Asia; few studies in specific occupational

397 settings or groups, relatively fewer studies examining outcomes of suicidal ideation or self-  
398 harm; and a lack of qualitative studies.

399 Studies in disability pension recipients

400 Thirteen eligible studies reported relevant outcomes in people with work disability who had  
401 received a disability pension. The studies are summarised in Table 3. Eleven studies reported  
402 suicide outcomes, seven intentional self-harm and 2 suicidal ideation. Studies were from six  
403 countries, including seven from Sweden, two from Finland and a single study from each of  
404 the United States, Australia, Germany and England. Seven studies did not specify a specific  
405 condition and included samples of people with work disability from diverse causes while four  
406 studies included samples of people with MHC.

407

**Table 3. Summary of disability pension studies**

| Author (Year) & Location                | Study Design & Follow-up period                        | Data sources                                                                         | Sample size & percent female            | Sample definition (exposed group)                                                                                     | Sample definition (Comparison group)                                                               | Primary outcome/s                                                                                            | Main finding                                                                                                                                                                                                                                                                                                                                          |
|-----------------------------------------|--------------------------------------------------------|--------------------------------------------------------------------------------------|-----------------------------------------|-----------------------------------------------------------------------------------------------------------------------|----------------------------------------------------------------------------------------------------|--------------------------------------------------------------------------------------------------------------|-------------------------------------------------------------------------------------------------------------------------------------------------------------------------------------------------------------------------------------------------------------------------------------------------------------------------------------------------------|
| Barr et al (2016)<br><br>England        | Ecological study<br><br>Not applicable                 | Participant questionnaire; Social security; Labour force statistics; Death register  | 1.03 million<br><br>Female % not stated | Adults (18 to 64 years) receiving disability pension whose eligibility was reassessed via a work capacity assessment. | Not applicable                                                                                     | Suicide<br><br>Area level, annual age-adjusted mortality rates from suicide and injury of undetermined cause | This area-level study found that local areas where a greater proportion of the population were exposed to DP work capacity reassessment process experienced a greater increase in suicides. These associations were independent of baseline conditions in these areas, and the increases followed rather than preceded, the reassessment process.     |
| Becker et al (2009)<br><br>Florida, USA | Retrospective Case Control Study<br><br>Not applicable | Medicaid eligibility and claim files                                                 | N=1,305<br><br>Female 63.6%             | Adults (age range not stated) enrolled in medicare and also receiving supplementary security income                   | Adults (age range not stated) enrolled in medicare but not receiving supplementary security income | Suicide<br><br>Identified from Medicaid files                                                                | This study found significantly greater odds of suicide in the exposed group receiving SSI than in the comparison group.<br><br>The three strongest predictors of suicide in the exposed group were psychiatric hospitalization, having an involuntary psychiatric examination, or receiving extensive behavioural health services.                    |
| Bjorkenstam et al (2014)<br><br>Sweden  | Prospective Cohort Study<br><br>14 years               | Social security; Death register; Hospital records; Social / labour market statistics | N=5,006,523<br><br>Female 48.8%         | Adults (16 to 64 years) granted full or part-time disability pension in 2004.                                         | Adults (16 to 64 years) not in receipt of disability pension in 2004.                              | Suicide<br><br>Based on ICD-10 codes in National Death Index                                                 | This study found a significantly higher hazard of suicide among both male and female DP recipients compared to control group.<br><br>The risk of suicide was highest in DP recipients with mental health diagnoses (men and women) and also significantly higher than control in those with musculoskeletal (women) and neurological (men) diagnoses. |

|                                       |                                         |                                                                                      |                             |                                                                                                                          |                                                                                          |                                                                                                                                                    |                                                                                                                                                                                                                                                                                                                                                                                                        |
|---------------------------------------|-----------------------------------------|--------------------------------------------------------------------------------------|-----------------------------|--------------------------------------------------------------------------------------------------------------------------|------------------------------------------------------------------------------------------|----------------------------------------------------------------------------------------------------------------------------------------------------|--------------------------------------------------------------------------------------------------------------------------------------------------------------------------------------------------------------------------------------------------------------------------------------------------------------------------------------------------------------------------------------------------------|
| Bjorkenstam et al (2015)<br>Sweden    | Prospective Cohort Study<br>6 years     | Social security; Death register; Hospital records; Social / labour market statistics | N=11,346<br>Female = 56.4%  | Adults (16 to 64 years) with Multiple Sclerosis receiving disability pension in 2004                                     | Adults (16 to 64 years) with Multiple Sclerosis not receiving disability pension in 2004 | Suicide Based on ICD-10 codes in Death Register<br><br>Suicide attempts Based on ICD-10 codes in Hospital Records                                  | This study reported a non-significant tendency towards a higher risk for suicidal behaviour in people with multiple sclerosis receiving the DP.                                                                                                                                                                                                                                                        |
| Butterworth et al (2006)<br>Australia | Cross-sectional study<br>Not applicable | Participant questionnaire                                                            | N=8,533<br>Female = 48.4%   | Adults (18 to 64 years) not in the labour force receiving the Disability Support Pension as their main source of income. | Adults not reliant on welfare payments                                                   | Suicidal ideation self-reported suicidal ideation in past 12 months<br><br>Intentional self-harm self-reported attempted suicide in past 12 months | This study reported that people not in the labour force (most of whom receive DP benefits) were more likely to report suicidal behaviours than the comparison group.                                                                                                                                                                                                                                   |
| Ehn et al (2016)<br>Sweden            | Cross-sectional study<br>Not applicable | Medical records; Participant questionnaire                                           | N=67<br>Female = 53%        | Adults (18 to 65 years) with Usher syndrome in receipt of disability pension                                             | Adults (18 to 65 years) with Usher syndrome not receiving the disability pension         | Suicidal ideation self-reported suicidal thoughts<br><br>Intentional self-harm self-reported attempted suicide                                     | This study reported that participants with Usher syndrome receiving the DP were significantly more likely to report having made at least one suicide attempt, and having a history of suicidal thoughts.                                                                                                                                                                                               |
| Jonsson et al (2013)<br>Sweden        | Prospective Cohort Study<br>5 years     | Social security; Death register; Hospital records; Social / labour market statistics | N=525,276<br>Female = 48.7% | Young adults (19 to 23 years) receiving a disability pension in 2005                                                     | Young adults (19 to 23 years) NOT receiving a disability pension in 2005                 | Intentional self-harm Based on ICD-10 codes in Hospital records<br><br>Suicide Based on ICD-10 codes from Death register                           | Young adults receiving DP with a mental health condition have a statistically higher risk of both suicide attempts and completed suicide. Particularly high hazard ratios were observed for those with bipolar affective disorder and personality disorders.<br><br>Young adults receiving DP with a somatic condition have a statistically higher risk of suicide attempt, but not completed suicide. |

|                                   |                                      |                                                                                      |                                                                                                                                                   |                                                                                                                                                                |                                                                                                                                                                    |                                                                                                                          |                                                                                                                                                                                                                                                                                                                                                                     |
|-----------------------------------|--------------------------------------|--------------------------------------------------------------------------------------|---------------------------------------------------------------------------------------------------------------------------------------------------|----------------------------------------------------------------------------------------------------------------------------------------------------------------|--------------------------------------------------------------------------------------------------------------------------------------------------------------------|--------------------------------------------------------------------------------------------------------------------------|---------------------------------------------------------------------------------------------------------------------------------------------------------------------------------------------------------------------------------------------------------------------------------------------------------------------------------------------------------------------|
| Jonsson et al (2014)<br>Sweden    | Prospective Cohort Study<br>5 years  | Social security; Death register; Hospital records; Social / labour market statistics | N Cohort 1 (1995) = 559,147<br>Female 48.9%<br><br>N Cohort 2 (2000) = 504,741<br>Female 48.9%<br><br>N Cohort 3 (2005) = 525,276<br>Female 48.7% | Young adults (19 to 23 years) receiving a disability pension benefit in 1995, 2000 or 2005                                                                     | Young adults (19 to 23 years) NOT receiving a disability pension benefit in 1995, 2000 or 2005                                                                     | Intentional self-harm Based on ICD-10 codes in Hospital records<br><br>Suicide Based on ICD-10 codes from Death register | Young adults receiving DP due to psychiatric diagnoses had statistically elevated risk of suicide and suicide attempt relative to comparison group in three separate cohorts.<br><br>Young adults receiving DP due to somatic diagnoses had statistically elevated risk of suicide attempt relative to comparison group in three separate cohorts, but not suicide. |
| Kiviniemi et al (2011)<br>Finland | Prospective Cohort Study<br>5 years  | Social security; Death register; Hospital records                                    | N=3,875<br>Female = 41.3%                                                                                                                         | Adults (16 to 65 years) with hospital admission due to schizophrenia receiving a Disability Pension during the 5-year period after the onset of schizophrenia. | Adults (16 to 65 years) with hospital admission due to schizophrenia NOT receiving a Disability Pension during the 5-year period after the onset of schizophrenia. | Suicide Based on ICD-10 codes from Death register                                                                        | This study found a significantly decreased likelihood for suicide mortality among people with schizophrenia receiving DP compared with schizophrenia without DP.                                                                                                                                                                                                    |
| Leinonen et al (2014)<br>Finland  | Prospective Cohort Study<br>11 years | Social security; Death register                                                      | N=392,985<br>Female = 45.1%                                                                                                                       | Adults (25 to 64 years) not work disabled in 2006 who receive a new disability pension due to common mental health conditions between 1997 and 2007.           | Other adults (25 to 64 years) not work disabled in 2006.                                                                                                           | Suicide Based on ICD-10 codes from Death register                                                                        | This study shows significantly higher mortality from suicide among DP recipients due to depression and other mental health conditions than among the population in general, among both male and female DP recipients. Hazard ratios for suicide were higher in female than in male DP recipients.                                                                   |

|                                   |                                                  |                                                                                      |                             |                                                                                                     |                                                                    |                                                                                                                                |                                                                                                                                                                                                                                                                                                                                                                                                                                                                                                                                         |
|-----------------------------------|--------------------------------------------------|--------------------------------------------------------------------------------------|-----------------------------|-----------------------------------------------------------------------------------------------------|--------------------------------------------------------------------|--------------------------------------------------------------------------------------------------------------------------------|-----------------------------------------------------------------------------------------------------------------------------------------------------------------------------------------------------------------------------------------------------------------------------------------------------------------------------------------------------------------------------------------------------------------------------------------------------------------------------------------------------------------------------------------|
| Rahman et al (2014)<br>Sweden     | Prospective Cohort Study<br>5 years              | Social security; Death register; Hospital records; Social / labour market statistics | N=46,745<br>Female = 66.3%  | Adults (18 to 64 years) with common mental health conditions receiving a disability pension in 2005 | none                                                               | Intentional self-harm<br>Based on ICD-10 codes in Hospital records<br><br>Suicide<br>Based on ICD-10 codes from Death register | Among people receiving DP due to mental health conditions, a higher risk of suicide attempt was observed among females, those with a prior suicide attempt, low education, living alone, younger age, prior inpatient care, prescribed antidepressants and anxiolytics.<br><br>A higher risk of suicide was observed among males, those with prior suicide attempt, living alone, prescribed antidepressants and anxiolytics.                                                                                                           |
| Rahman et al (2016)<br>Sweden     | Prospective Cohort Study<br>5 years              | Social security; Death register; Hospital records; Social / labour market statistics | N=46,515<br>Female = 66.4%  | Adults (18 to 64 years) with common mental health conditions receiving a disability pension in 2005 | none                                                               | Intentional self-harm<br>Based on ICD-10 codes in Hospital records<br><br>Suicide<br>Based on ICD-10 codes from Death register | People with a main DP diagnosis of 'depressive disorders' had a greater risk of subsequent suicide and suicide attempt than those with a diagnosis of 'stress related disorders'. Substance abuse or personality disorders as a secondary DP diagnosis was statistically associated with suicide attempt in men, women and across age group, and suicide in women and younger individuals. People in receipt of a full-time DP had a higher risk of suicide attempt than those receiving a part-time DP in women and across age groups. |
| Schneider et al (2011)<br>Germany | Retrospective Case Control Study<br>Not reported | Key informant interviews                                                             | N=559 total<br>Female 40.6% | Adults (age range not stated) in receipt of a disability pension (period not stated)                | Community controls matched by age, gender and residential location | Suicide<br>Based on ICD-10 codes from Death register                                                                           | This study observed a significantly increased risk of suicide in the DP group compared to the healthy community control group.                                                                                                                                                                                                                                                                                                                                                                                                          |



409 Eight prospective cohort studies involved analysis of linked datasets such as social security  
410 records, death registry data and hospital records. Two cross-sectional studies involved  
411 collection and analysis of participant questionnaire and medical records. There were two  
412 case-control studies and these also involved analysis of medical care eligibility and payment  
413 files, and key informant interviews. Finally, a single ecological study examined area level  
414 data from multiple, unlinked sources. Among the longitudinal studies, follow-up periods  
415 ranged from 5 to 14 years. Overall, these studies demonstrate an elevated risk of suicide and  
416 self-harm among people with work disability receiving a disability pension.

417 Four prospective cohort studies showed a higher rate of suicide or self-harm during follow-up  
418 among people receiving a disability pension during the study inception period, compared to  
419 those not receiving a disability pension (52-55). All of these studies observed that people  
420 with work disability due to mental health conditions are at greater risk of suicide, while one  
421 also reported elevated risk of self-harm in those with mental health conditions (54), and three  
422 reported elevated risk of suicide among people with DP due to other conditions including  
423 musculoskeletal disorders (52), and suicide attempt in young people with somatic disorders  
424 (53, 54). A single prospective cohort study observed significantly decreased suicide mortality  
425 among people with schizophrenia receiving a DP compared to people with schizophrenia not  
426 receiving a DP (56), while a further prospective cohort study observed no association  
427 between receiving a DP in 2004 and suicide or self-harm among people with multiple  
428 sclerosis during a 6 year follow-up period (57).

429 Two further prospective cohort studies examined predictors of self-harm and suicide among  
430 Swedes receiving DP with common mental health conditions (58, 59). These studies observe  
431 a higher risk of suicide and suicide attempt among those with prior suicide attempt, living  
432 alone and who had been prescribed antidepressants or anxiolytic medicines. Additional risk  
433 factors for suicide included female sex, younger age and history of inpatient care, while

434 males had higher risk of suicide mortality. People whose primary DP diagnoses was  
435 depressive disorders had the greatest risk of suicide and suicide attempt. Two cross sectional  
436 studies observed that people receiving DP were more likely to report a history of suicidal  
437 thoughts or intentional self-harm. These included one study of Australian DP recipients (60)  
438 and a second study of Swedish DP recipients with Usher syndrome (61).

439 Two retrospective case-control studies observed greater odds of suicide in low income people  
440 receiving DP compared to those not receiving DP (62), and an increased risk of suicide  
441 among German adults receiving a DP compared to a healthy community control group (63).

442 Finally, a single ecological study conducted in England observed an increase in rates of  
443 suicide in those local areas where a greater proportion of the population had their eligibility  
444 for DP benefits re-assessed via a work capacity assessment (64).

445 Some notable gaps in this literature include few studies outside Nordic countries, few studies  
446 in specific occupational settings or groups, relatively fewer studies examining outcomes of  
447 suicidal ideation or self-harm; and a lack of qualitative studies.

#### 448 Studies of mixed samples

449 Five eligible studies reported relevant outcomes in mixed samples of people with work  
450 disability who had received either a sickness absence payment or a disability pension. The  
451 studies are summarised in Table 4. Four reported suicide outcomes and three intentional self-  
452 harm. Four were from Sweden and the fifth from Denmark. One was in a sample of people  
453 with work disability due to MHC, and the remaining four included samples of people with  
454 work disability arising from diverse conditions. All five involved analysis of linked datasets  
455 such as social security records, death registry data and hospital records. These studies are  
456 consistent with those of the SA and DP studies described above, and provide further evidence

457 of an association between work disability resulting in receipt of income support payments  
458 and later suicide and self-harm.

459 One population based prospective cohort study observed elevated risk of intentional self-  
460 harm and suicide in Swedish adults with and without MHCs receiving SA or DP benefits in  
461 2005, compared to adults not receiving benefits (65). This study also observed a positive  
462 association between outcomes and longer durations of work disability. Niederkroenthaler et  
463 al (66) observed elevated risk of self-harm among hospitalised adults with long-term SA, and  
464 also elevated risk of self-harm or suicide among hospitalised adults in receipt of DP. A  
465 retrospective cohort study of adults who completed suicide between 2007 and 2010 observed  
466 five different trajectories of SA/DP receipt in the five-year period preceding suicide (67). The  
467 two largest trajectory groups included nearly half of the sample who had received on average  
468 a few months/year of SA/DP benefits, and approximately a further third of the sample who  
469 had received more than 10 months/year of SA/DP benefits. A prospective twin study  
470 observed that twins with MHC who received either SA or DP benefits between 2005 and  
471 2010 had greater risk of self-harm than their adult twins without SA/DP receipt (68). Finally,  
472 a Danish retrospective case-control study observed that receipt of SA benefits was a  
473 significant risk factor for suicide in men, but not women, but that receipt of a disability  
474 pension was not associated with suicide in either men or women.(69)

**Table 4. Summary of mixed sickness absence / disability pension studies**

| Author (Year) & Location                     | Study Design & Follow-up period                        | Data sources                                                                         | Sample size & Percent female                                             | Study (Exposure) Group                                                                                                                                                    | Comparison Group                                                                                      | Primary outcome/s                                                                                                              | Main finding                                                                                                                                                                                                                                                                                                                                                           |
|----------------------------------------------|--------------------------------------------------------|--------------------------------------------------------------------------------------|--------------------------------------------------------------------------|---------------------------------------------------------------------------------------------------------------------------------------------------------------------------|-------------------------------------------------------------------------------------------------------|--------------------------------------------------------------------------------------------------------------------------------|------------------------------------------------------------------------------------------------------------------------------------------------------------------------------------------------------------------------------------------------------------------------------------------------------------------------------------------------------------------------|
| Bjorkenstam et al (2020)<br><br>Sweden       | Prospective Cohort Study<br><br>8 years                | Social security; Death register; Hospital records; Social / labour market statistics | N = 4,195,058<br><br>Female 46.3%                                        | Adults (16 to 64 years) receiving either a sickness absence benefit or disability pension during 2005.                                                                    | Adults (16 to 64 years) NOT receiving a sickness absence benefit or a disability pension during 2005. | Suicide<br>Based on ICD-10 codes in Death Register<br><br>Intentional self-harm<br>Based on ICD-10 codes from Hospital Records | Both sickness absence and disability pension were associated with elevated risk of intentional self-harm and suicide in individuals with and without mental health conditions<br><br>In Swedish-born, the risk of intentional self-harm and suicide increased as the duration of sickness absence days increased, in people with and without mental health conditions. |
| Niederkrödenhaler et al (2020)<br><br>Sweden | Retrospective Cohort Study<br><br>Not applicable       | Social security; Death register; Hospital records; Social / labour market statistics | N = 42,684<br><br>Female 55.3%                                           | Adults (20 to 64 years) hospitalised for intentional self-harm who received either a sickness absence benefit or disability pension in the year prior to hospitalisation. | none                                                                                                  | Suicide<br>Based on ICD-10 codes in Death Register<br><br>Intentional self-harm<br>Based on ICD-10 codes from Hospital Records | Long term sickness absence was associated with elevated risk of intentional self-harm. Receipt of disability pension was associated with elevated risk of both intentional self-harm and suicide death.                                                                                                                                                                |
| Qin et al (2000)<br><br>Denmark              | Retrospective Case control Study<br><br>Not applicable | Death register; Hospital records; Social security; Labour market statistics          | N = 811 cases<br>Female 33.3%<br><br>N = 79,871 controls<br>Female 50.1% | People (16 to 78 years) who completed suicide between 1982 and 1994.                                                                                                      | Community controls matched to cases (matching variables not specified)                                | Suicide<br>Based on ICD-10 codes in Death Register                                                                             | Receipt of sickness absence benefit was a significant risk factor for suicide in men, but not women. Receipt of a disability pension <b>was not</b> associated with suicide in either men or women.                                                                                                                                                                    |

|                             |                                                  |                                                                                                          |                                                                                                          |                                                                                                                                                |                                                                                                                                   |                                                                      |                                                                                                                                                                                                                                                                                                                                                                                                                                                                                                                                                   |
|-----------------------------|--------------------------------------------------|----------------------------------------------------------------------------------------------------------|----------------------------------------------------------------------------------------------------------|------------------------------------------------------------------------------------------------------------------------------------------------|-----------------------------------------------------------------------------------------------------------------------------------|----------------------------------------------------------------------|---------------------------------------------------------------------------------------------------------------------------------------------------------------------------------------------------------------------------------------------------------------------------------------------------------------------------------------------------------------------------------------------------------------------------------------------------------------------------------------------------------------------------------------------------|
| Wang et al (2015)<br>Sweden | Retrospective Cohort Study<br><br>Not applicable | Social security; Death register; Hospital records; Social / labour market statistics                     | N = 4,209<br>Female 29.1%                                                                                | Adults (22 to 65 years) who completed suicide between 2007 and 2010                                                                            | None                                                                                                                              | Suicide<br>Based on ICD-10 codes in Death Register                   | This study observed five different trajectories of work-related functional impairment in the five-year period preceding suicide. Nearly half of people completing suicide had a few months per year of sickness absence/disability pension, while one third recorded more than 10 month per year of sickness absence/disability pension. Two smaller groups had increasing trends of sickness absence/disability pension in the months preceding suicide, while the final smallest group recorded a decreasing number of months prior to suicide. |
| Wang et al (2020)<br>Sweden | Prospective Twin Study<br><br>2 to 8 years       | Social security; Death register; Hospital records; Social / labour market statistics; Participant survey | N = 4871 twin pairs<br>Female 70.1% of twins in exposure group<br>Female 52.9% of twins in control group | Adult twins (18 to 65 years) with mental health conditions who received a sickness absence benefit or disability pension between 2005 and 2010 | Adult twins (18 to 65 years) without sickness absence or disability pension due to mental health conditions between 2005 and 2010 | Intentional self-harm<br>Based on ICD-10 codes from Hospital Records | This study shows that sickness absence or disability pension due to common mental health conditions predicts subsequent suicide attempt even after adjustment for familial factors. Specific CMD SA/DP diagnoses also showed higher risks of suicide attempt. This effect was greater in men than women, but significant in both. Higher risks were observed in people with depressive and anxiety disorders than in those with stress-related disorders.                                                                                         |

## DISCUSSION

The risk of suicide and intentional self-harm is elevated in people experiencing work disability. This relationship is observed among people receiving work disability income support from workers' compensation, disability pension and sickness absence systems; across multiple nations; and in people who are work disabled due to mental health conditions, musculoskeletal disorders, traumatic injury and other medical conditions including neurological disorders. Of the 44 quantitative studies included in this review, 41 showed a statistically significant positive relationship between work disability and suicide or self-harm. Only one study showed a negative (protective) relationship, and two showed no effect. While the relationship between work disability and suicide or self-harm is robust, in that it occurs in multiple settings and cohorts, we also observe that a range of health, social, demographic and administrative factors are associated with elevated risk of suicidal behaviour among people with work disability. These include longer durations of work disability, work disability arising from mental health conditions, younger age and female sex, a history of poor health, and living alone. Three qualitative studies in workers' compensation systems and an ecological study of disability pension eligibility re-assessment suggest that burdensome administrative processes in income support systems may also contribute to risk of suicidal behaviour in work disabled people.

Overall, our findings suggest an opportunity for reducing suicide and self-harm among working age people, via preventive interventions focused on those experiencing work disability. In developed nations with established work disability support systems such as workers' compensation and disability pension schemes, there are multiple opportunities for identification of those at risk, and delivery of preventive interventions along the pathway between work disability and suicide. These include at the onset of work absence, upon application for income support, during delivery of treatment and workplace rehabilitation

programs, and at periods of review such as during the assessment of entitlement to ongoing benefits which are a feature of most work disability support systems in developed nations (11, 64). At each of these points workers engage with formal systems operated by government, employers or government-appointed organisations involved in case management and healthcare delivery. These represent opportunities for identification of those most at risk, and delivery of services and supports to reduce risk (70). For instance, to detect and monitor individuals at increased risk of suicide, organisations providing case management services could establish follow-up protocols for those whose work disability is due to mental health conditions. Our findings also indicate the need for more careful consideration of psychological supports and risk mitigation strategies during the process of worker rehabilitation, when there may be opportunities to address modifiable risk factors. These approaches could be adapted, for example, from existing screening and early intervention programs that seek to identify people with risk factors for long periods of work disability(71, 72).

Many of the studies included in this scoping review had features of rigorous observational study design. Multiple studies included using population-based data capture, linkage of multiple data sources across health care and work disability systems, incorporated long follow-up periods beyond the period of work disability, utilised healthy community or other comparison groups, or adjusted statistical estimates for multiple potential confounding factors including health status prior to work disability. There are also quality issues in some studies, for example studies reporting only descriptive statistics(29), cross-sectional studies (49, 51, 60, 61) and small sample sizes (29, 47, 51, 61). Studies used a range of different outcome measures, and applied variety of statistical analysis techniques. As a consequence, study outcomes were reported variously using odds ratios, hazards ratios, risk ratios, standardised mortality ratios, trajectory models and descriptive statistics. While this makes it challenging

to compare the strength of relationship between work disability and suicide/self-harm outcomes between studies, some broad trends were observed.

People with work disability due to common mental health conditions were observed in multiple studies to be at higher risk of later suicidal behaviour than people with work disability due to other conditions. For example, a population based register study by Wang et al (38) reports highest hazards of both suicide and self-harm in both male and female participants with MHCs than participants with other conditions. This pattern is repeated in multiple studies in sickness absence (36, 37, 49) and disability pension systems (52-55), and for self-harm outcomes (43, 54). These findings are broadly consistent with the extensive literature demonstrating elevation of suicide risk in people with mental health conditions, and suggest that people with work-disability due to mental illness should be screened for suicide risk. We also observe elevated risk of suicide and self-harm among people with work disability due to other physical conditions, including those with musculoskeletal disorders, injury and neurological conditions. Notably, our review identified studies reporting elevated risks in people with musculoskeletal disorders in sickness absence systems (38), for women receiving the disability pension (52), in people with different MSD diagnoses (35), and for self-harm outcomes (38). It is possible that comorbidity between mental health conditions and MSDs helps to explain these findings. These studies also demonstrate the importance of identifying and monitoring groups with common physical health conditions such as MSD to identify individuals who may benefit from intervention.

Multiple studies also report that people with longer durations of work disability were at significantly elevated risk. For example, Lundin et al (45) observed that the odds of suicide over a five year follow-up period in people sickness absent for more than 62 days during 1992-93 was 8.68 for women, and 4.41 for men, relative to people with 0 to 15 days sickness absence during the inception period. Similar trends were observed in healthcare workers (49),



in males by Tang et al (42), in Finnish local government workers (73), in disability pensioners (65), and for self-harm outcomes (44). Several authors propose that the duration of work disability does not only reflect the chronicity or severity of the health condition underlying work disability, but may also reflect other factors that can increase suicide risk, such as poor quality medical treatment, delayed help-seeking, presence of adverse health behaviours such as substance use and social isolation (44). Importantly, our findings also suggest that work disability prevention interventions that reduce duration of disability, and thus both promote engagement in work and potentially limit exposure to these other adverse factors, may also contribute to reduced risk of suicide and self-harm. The common features of effective work disability prevention interventions are well-documented, with multiple studies reporting effective interventions in workers with mental health conditions and musculoskeletal disorders (74). Longer-term follow-up of participants enrolled in work disability prevention trials appears warranted.

Our evidence synthesis grouped studies by the nature of the work disability system via which people were accessing income support. We chose this approach so that study findings would be relevant to those involved in administering, and providing care and support, within those systems. This approach also demonstrates that there is a stronger evidence base in some systems and nations than others. We included the largest number of studies in sickness absence and then disability pension systems, with most of these studies located in European nations. In contrast there were fewer studies included from workers' compensation systems, and also from North American and Asian nations where such systems are more commonly a feature of government work disability support. The evidence base is larger when suicide is the measured outcome, than for self-harm as an outcome, where there are fewer studies. We identified even fewer studies reporting suicidal ideation in work disabled samples. There is value in filling these evidence gaps in order to better understand the relationship between

work disability and suicide or self-harm within work disability systems and within nations.

Further studies on suicidal ideation would provide critical information to explore the pathway from work disability through suicidal ideation to completed suicide, which may inform preventive interventions.

This scoping review provides an overview of the evidence relating to work disability, suicide and self-harm. We sought to draw together a diverse evidence base from across different systems of work disability support, to examine this relationship. As per accepted scoping review methods, we included a wide range of study designs, utilised systematic and transparent processes for searching and mapping retrieved studies. Our study is subject to the known limitations of scoping review methods, including that we did not appraise the quality of included studies, and that the broad scope of the research questions made it difficult to draw definitive conclusions regarding particular populations and subgroups. The studies included did not examine intermediate factors between work disability and mortality, which may include things such as opioid prescriptions, or the quality and nature of treatment, presenting an opportunity for further studies. Specifically, we did not identify any studies of suicide prevention in work disabled samples. This is a substantial gap in the evidence base given the findings of our review.

## **CONCLUSIONS**

The risk of suicide and intentional self-harm is elevated in people experiencing work disability. Within work disabled samples, several factors may place individuals at greater risk of later suicidal behaviour, including disability due to mental health conditions and longer duration of disability. However, the relationship between work disability and suicidal behaviour is observed consistently across nations, across work disability support systems and in people with a range of underlying health conditions. While further observational research is required to further understanding and fill gaps in the evidence base, this review suggests

the need for governments, employers and those involved in the delivery of care and support to people with work disability to focus on identification and monitoring of those at greatest risk of suicidal behaviour, as well as suicide prevention in the highest risk.

## **ACKNOWLEDGMENTS**

The authors would like to acknowledge the contribution of Ms Karki Kajal to article searching and screening. Professor Alex Collie is supported by an Australian Research Council (ARC) Future Fellowship (FT190100218). Funders played no role in the scoping review.

## **REFERENCES**

1. Loisel P, Anema JR, MacEachen E, Feuerstein M, Pransky G, Costa-Black K. Handbook of Work Disability: Prevention and Management. New York: Springer; 2013.
2. Collie A, Sheehan L, Lane TJ, Iles R. Psychological Distress in Workers' Compensation Claimants: Prevalence, Predictors and Mental Health Service Use. *J Occup Rehabil.* 2020;30(2):194-202.
3. Orchard C, Carnide N, Mustard C, Smith PM. Prevalence of serious mental illness and mental health service use after a workplace injury: a longitudinal study of workers' compensation claimants in Victoria, Australia. *Occup Environ Med.* 2020;77(3):185-7.
4. Kposowa AJ. Unemployment and suicide: a cohort analysis of social factors predicting suicide in the US National Longitudinal Mortality Study. *Psychological medicine.* 2001;31(1):127-38.
5. Nylen L, Voss M, Floderus B. Mortality among women and men relative to unemployment, part time work, overtime work, and extra work: a study based on data from the Swedish twin registry. *Occup Environ Med.* 2001;58(1):52-7.

6. Mason V. The prevalence of back pain in Great Britain. . London: Office of Population Censuses and surveys, HMSO, ; 1994.
7. Collie A, Sheehan L, McAllister A. Health service use of Australian unemployment and disability benefit recipients: a national, cross-sectional study. *BMC Health Serv Res.* 2021;21(1):249.
8. Kilgour E, Kosny A, McKenzie D, Collie A. Interactions between injured workers and insurers in workers' compensation systems: a systematic review of qualitative research literature. *J Occup Rehabil.* 2015;25(1):160-81.
9. Collie A, Sheehan LR, McAllister A. The health of disability support pension and Newstart allowance recipients. Melbourne: Monash Public Health and Preventative Medicine; 2019.
10. Carnide N, Franche RL, Hogg-Johnson S, Cote P, Breslin C, Severin CN, et al. Course of depressive symptoms following a workplace injury: A 12 month follow up update. *Journal of Occupational Rehabilitation.* 2016;26:204-15.
11. Collie A, Di Donato M, Iles R. Work Disability in Australia: An Overview of Prevalence, Expenditure, Support Systems and Services. *J Occup Rehabil.* 2018.
12. Paul KI, Moser K. Unemployment impairs mental health: Meta-analyses. *Journal of Vocational Behavior.* 2009;74(3):268-82.
13. Milner A, Page A, LaMontagne AD. Long-term unemployment and suicide: a systematic review and meta-analysis. *PLoS One.* 2013;8(1):e51333.
14. Collie A, Sheehan LR, Lane T. Changes in Access to Australian Disability Support Benefits During a Period of Social Welfare Reform. *Journal of Social Policy.* 2021;(accepted Nov 2020).

15. Collie A, Sheehan L, Lane TJ, Gray S, Grant G. Injured worker experiences of insurance claim processes and return to work: a national, cross-sectional study. *BMC Public Health*. 2019;19(1):927.
16. Grant GM, O'Donnell ML, Spittal MJ, Creamer M, Studdert DM. Relationship between stressfulness of claiming for injury compensation and long-term recovery: a prospective cohort study. *JAMA Psychiatry*. 2014;71(4):446-53.
17. Lippel K. Workers describe the effect of the workers' compensation process on their health: A Quebec study. *Int J Law Psychiat*. 2007;30(4-5):427-43.
18. Sheehan LR, Lane TJ, Collie A. The Impact of Income Sources on Financial Stress in Workers' Compensation Claimants. *J Occup Rehabil*. 2020.
19. Kosny A, Newnam S, Collie A. Family matters: compensable injury and the effect on family. *Disabil Rehabil*. 2018;40(8):935-44.
20. Otsuka T, Tomata Y, Zhang S, Tanji F, Sugawara Y, Tsuji I. The association between emotional and instrumental social support and risk of suicide death: A population-based cohort study. *J Psychiatr Res*. 2019;114:141-6.
21. Australian Institute of Health and Welfare. Australia's Health 2020 Canberra, Australia: Australian Institute of Health and Welfare; 2021 [updated 23 July 2020. Available from: <https://www.aihw.gov.au/reports-data/australias-health>.
22. Arksey H, O'Malley L. Scoping studies: towards a methodological framework. *International Journal of Social Research Methodology*. 2005;8:19-32.
23. Levac D, Colquhoun H, O'Brien KK. Scoping studies: advancing the methodology. *Implement Sci*. 2010;5:69.

24. Applebaum KM, Asfaw A, O'Leary PK, Busey A, Tripodis Y, Boden LI. Suicide and drug-related mortality following occupational injury. *Am J Ind Med.* 2019;62(9):733-41.
25. Martin CJ, Jin CF, Bertke SJ, Yiin JH, Pinkerton LE. Increased overall and cause-specific mortality associated with disability among workers' compensation claimants with low back injuries. *Am J Ind Med.* 2020;63(3):209-17.
26. Lee HE, Kim I, Kim MH, Kawachi I. Increased risk of suicide after occupational injury in Korea. *Occup Environ Med.* 2021;78(1):43-5.
27. Lin SH, Lee HY, Chang YY, Jang Y, Chen PC, Wang JD. Increased mortality risk for workers with a compensated, permanent occupational disability of the upper or lower extremities: A 21-Year follow-up study. *American Journal of Epidemiology.* 2010;171(8):917-23.
28. Fishbain DA, Bruns D, Disorbio JM, Lewis JE. Risk for five forms of suicidality in acute pain patients and chronic pain patients vs pain-free community controls. *Pain Med (USA).* 2009;10(6):1095-105.
29. Routley V, Ozanne-Smith J, Davis MC. Suicide following work-related injury in Victoria, Australia. *Journal of Health, Safety and Environment.* 2012;online e-journal(28-323).
30. MacEachen E, Kosny A, Ferrier S, Chambers L. The "toxic dose" of system problems: why some injured workers don't return to work as expected. *J Occup Rehabil.* 2010;20(3):349-66.
31. MacEachen E, Kosny A, Ferrier S. Unexpected barriers in return to work: lessons learned from injured worker peer support groups. *Work.* 2007;29(2):155-64.
32. Billingsley S. Sick leave absence and the relationship between intra-generational social mobility and mortality: Health selection in Sweden. *BMC Public Health.* 2020;20(1).

33. Björkenstam E, Weitoft GR, Lindholm C, Björkenstam C, Alexanderson K, Mittendorfer-Rutz E. Associations between number of sick-leave days and future all-cause and cause-specific mortality: A population-based cohort study. *BMC Public Health*. 2014;14(1).
34. Bryngelson A, Åsberg M, Nygren Å, Jensen I, Mittendorfer-Rutz E. All-Cause and Cause-Specific Mortality after Long-Term Sickness Absence for Psychiatric Disorders: A Prospective Cohort Study. *PLoS ONE*. 2013;8(6).
35. Jansson C, Mittendorfer-Rutz E, Alexanderson K. Sickness absence because of musculoskeletal diagnoses and risk of all-cause and cause-specific mortality: A nationwide Swedish cohort study. *Pain*. 2012;153(5):998-1005.
36. Melchior M, Ferrie JE, Alexanderson K, Goldberg M, Kivimaki M, Singh-Manoux A, et al. Does sickness absence due to psychiatric disorder predict cause-specific mortality? A 16-year follow-up of the GAZEL occupational cohort study. *American Journal of Epidemiology*. 2010;172(6):700-7.
37. Mittendorfer-Rutz E, Kjeldgård L, Runeson B, Perski A, Melchior M, Head J, et al. Sickness Absence Due to Specific Mental Diagnoses and All-Cause and Cause-Specific Mortality: A Cohort Study of 4.9 Million Inhabitants of Sweden. *PLoS ONE*. 2012;7(9).
38. Wang M, Alexanderson K, Runeson B, Head J, Melchior M, Perski A, et al. Are all-cause and diagnosis-specific sickness absence, and sick-leave duration risk indicators for suicidal behaviour? A nationwide register-based cohort study of 4.9 million inhabitants of Sweden. *Occup Environ Med*. 2014;71(1):12-20.
39. Wang M, Alexanderson K, Runeson B, Mittendorfer-Rutz E. Morbidity and suicide mortality following sick leave in relation to changes of social insurance regulations in Sweden. *Eur J Public Health*. 2016;26(6):1061-9.

40. Lunde KB, Mehlum L, Melle I, Qin P. Deliberate self-harm and associated risk factors in young adults: the importance of education attainment and sick leave. *Soc Psychiatry Psychiatr Epidemiol.* 2021;56(1):153-64.
41. Leira WS, Bjerkeset O, Reitan SK, Stordal E, Roaldset JO. Characteristics associated with later self-harm hospitalization and/or suicide: A follow-up study of the HUNT-2 cohort, Norway. *J Affective Disord.* 2020;276:369-79.
42. Tang F, Mehlum L, Mehlum IS, Qin P. Physical illness leading to absence from work and the risk of subsequent suicide: A national register-based study. *Eur J Public Health.* 2019;29(6):1073-8.
43. Dorner TE, Mittendorfer-Rutz E. Socioeconomic inequalities in treatment of individuals with common mental disorders regarding subsequent development of mental illness. *Soc Psychiatry Psychiatr Epidemiol.* 2017;52(8):1015-22.
44. Ishtiak-Ahmed K, Perski A, Mittendorfer-Rutz E. Predictors of suicidal behaviour in 36,304 individuals sickness absent due to stress-related mental disorders - A Swedish register linkage cohort study. *BMC Public Health.* 2013;13(1).
45. Lundin A, Lundberg I, Allebeck P, Hemmingsson T. Unemployment and suicide in the Stockholm population: A register-based study on 771,068 men and women. *Public Health.* 2012;126(5):371-7.
46. Wang M, Alexanderson K, Runeson B, Mittendorfer-Rutz E. Sick-leave measures, socio-demographic factors and health care as risk indicators for suicidal behavior in patients with depressive disorders - A nationwide prospective cohort study in Sweden. *J Affective Disord.* 2015;173:201-10.



47. Braquehais MD, González-Irizar O, Nieva G, Mozo X, Llavayol E, Pujol T, et al. Assessing high risk of suicide amongst physicians and nurses in treatment. *Psychiatry Res.* 2020;291.
48. Vahtera J, Pentti J, Kivimäki M. Sickness absence as a predictor of mortality among male and female employees. *J Epidemiol Community Health.* 2004;58(4):321-6.
49. Szlejf C, Kumow A, Dadão R, Duim E, Assalim VM. Association of Sickness Absence With Severe Psychiatric Outcomes in a Brazilian Health Workforce. *Journal of occupational and environmental medicine.* 2020;62(10):e543-e7.
50. Roškar S, Sedlar N, Furman L, Roškar M, Podlesek A. Association of selected area-level indicators with suicide mortality in slovenian municipalities. *Crisis.* 2020.
51. Ando S, Kasai K, Matamura M, Hasegawa Y, Hirakawa H, Asukai N. Psychosocial factors associated with suicidal ideation in clinical patients with depression. *J Affective Disord.* 2013;151(2):561-5.
52. Bjorkenstam C, Alexanderson K, Bjorkenstam E, Lindholm C, Mittendorfer-Rutz E. Diagnosis-specific disability pension and risk of all-cause and cause-specific mortality--a cohort study of 4.9 million inhabitants in Sweden. *BMC Public Health.* 2014;14:1247.
53. Jonsson U, Alexanderson K, Kjeldgard L, Mittendorfer-Rutz E. Psychiatric diagnoses and risk of suicidal behaviour in young disability pensioners: prospective cohort studies of all 19-23 year olds in Sweden in 1995, 2000, and 2005, respectively. *PLoS ONE [Electronic Resource].* 2014;9(11):e111618.
54. Jonsson U, Alexanderson K, Kjeldgård L, Westerlund H, Mittendorfer-Rutz E. Diagnosis-specific disability pension predicts suicidal behaviour and mortality in young adults: A nationwide prospective cohort study. *BMJ Open.* 2013;3(2).

55. Leinonen T, Martikainen P, Laaksonen M, Lahelma E. Excess mortality after disability retirement due to mental disorders: variations by socio-demographic factors and causes of death. *Soc Psychiatry Psychiatr Epidemiol*. 2014;49(4):639-49.
56. Kiviniemi M, Suvisaari J, Pirkola S, Läksy K, Häkkinen U, Isohanni M, et al. Five-year follow-up study of disability pension rates in first-onset schizophrenia with special focus on regional differences and mortality. *Gen Hosp Psychiatry*. 2011;33(5):509-17.
57. Bjorkenstam C, Tinghog P, Brenner P, Mittendorfer-Rutz E, Hillert J, Jokinen J, et al. Is disability pension a risk indicator for future need of psychiatric healthcare or suicidal behavior among MS patients- a nationwide register study in Sweden? *BMC Psychiatry*. 2015;15:286.
58. Rahman S, Alexanderson K, Jokinen J, Mittendorfer-Rutz E. Risk factors for suicidal behaviour in individuals on disability pension due to common mental disorders - A nationwide register-based prospective cohort study in Sweden. *PLoS ONE*. 2014;9(5).
59. Rahman SG, Alexanderson K, Jokinen J, Mittendorfer-Rutz E. Disability pension due to common mental disorders and subsequent suicidal behaviour: A population-based prospective cohort study. *BMJ Open*. 2016;6(4).
60. Butterworth P, Fairweather AK, Anstey KJ, Windsor TD. Hopelessness, demoralization and suicidal behaviour: The backdrop to welfare reform in Australia. *Aust New Zealand J Psychiatry*. 2006;40(8):648-56.
61. Ehn M, Möller K, Danermark B, Möller C. The relationship between work and health in persons with usher syndrome type 2. *J Vis Impairm Blindn*. 2016;110(4):233-44.
62. Becker M, Brown L, Ochshorn E, Diamond R. Risk for suicide among medicaid beneficiaries. *Suicide Life-Threat Behav*. 2009;39(2):172-81.

63. Schneider B, Grebner K, Schnabel A, Hampel H, Georgi K, Seidler A. Impact of employment status and work-related factors on risk of completed suicide. A case-control psychological autopsy study. *Psychiatry Res.* 2011;190(2-3):265-70.
64. Barr B, Taylor-Robinson D, Stuckler D, Loopstra R, Reeves A, Whitehead M. 'First, do no harm': are disability assessments associated with adverse trends in mental health? A longitudinal ecological study. *J Epidemiol Community Health.* 2016;70(4):339-45.
65. Bjorkenstam E, Helgesson M, Amin R, Lange T, Mittendorfer-Rutz E. Mental disorders and suicidal behavior in refugees and Swedish-born individuals: is the association affected by work disability? *Social Psychiatry & Psychiatric Epidemiology.* 2020;55(8):1061-71.
66. Niederkrotenthaler T, Mittendorfer-Rutz E, Mehlum L, Qin P, Bjorkenstam E. Previous suicide attempt and subsequent risk of re-attempt and suicide: Are there differences in immigrant subgroups compared to Swedish-born individuals? *J Affective Disord.* 2020;265:263-71.
67. Wang M, Björkenstam C, Alexanderson K, Runeson B, Tinghög P, Mittendorfer-Rutz E. Trajectories of work-related functional impairment prior to Suicide. *PLoS ONE.* 2015;10(10).
68. Wang M, Mather L, Svedberg P, Mittendorfer-Rutz E. Suicide attempt following sickness absence and disability pension due to common mental disorders: a prospective Swedish twin study. *Soc Psychiatry Psychiatr Epidemiol.* 2020;55(8):1053-60.
69. Qin P, Agerbo E, Westergaard-Nielsen N, Eriksson T, Mortensen PB. Gender differences in risk factors for suicide in Denmark. *Br J Psychiatry.* 2000;177(DEC.):546-50.

70. Davis MC, Ibrahim JE, Ranson D, Ozanne-Smith J, Routley V. Work-related musculoskeletal injury and suicide: opportunities for intervention and therapeutic jurisprudence. *J Law Med.* 2013;21(1):110-21.
71. Nicholas MK, Costa DSJ, Linton SJ, Main CJ, Shaw WS, Pearce G, et al. Implementation of Early Intervention Protocol in Australia for 'High Risk' Injured Workers is Associated with Fewer Lost Work Days Over 2 Years Than Usual (Stepped) Care. *J Occup Rehabil.* 2020;30(1):93-104.
72. Iles R, Sheehan L, Munk K, Gosling C. Development and Pilot Assessment of the PACE Tool: Helping Case Managers Identify and Respond to Risk Factors in Workers' Compensation Case Management. *J Occup Rehabil.* 2020;30(2):167-82.
73. Vahtera J, Pentti J, Kivimaki M. Sickness absence as a predictor of mortality among male and female employees. *Journal of Epidemiology & Community Health.* 2004;58(4):321-6.
74. Cullen KL, Irvin E, Collie A, Clay F, Gensby U, Jennings PA, et al. Effectiveness of Workplace Interventions in Return-to-Work for Musculoskeletal, Pain-Related and Mental Health Conditions: An Update of the Evidence and Messages for Practitioners. *J Occup Rehabil.* 2018;28(1):1-15.

**Figure 1. PRISMA Flowchart**

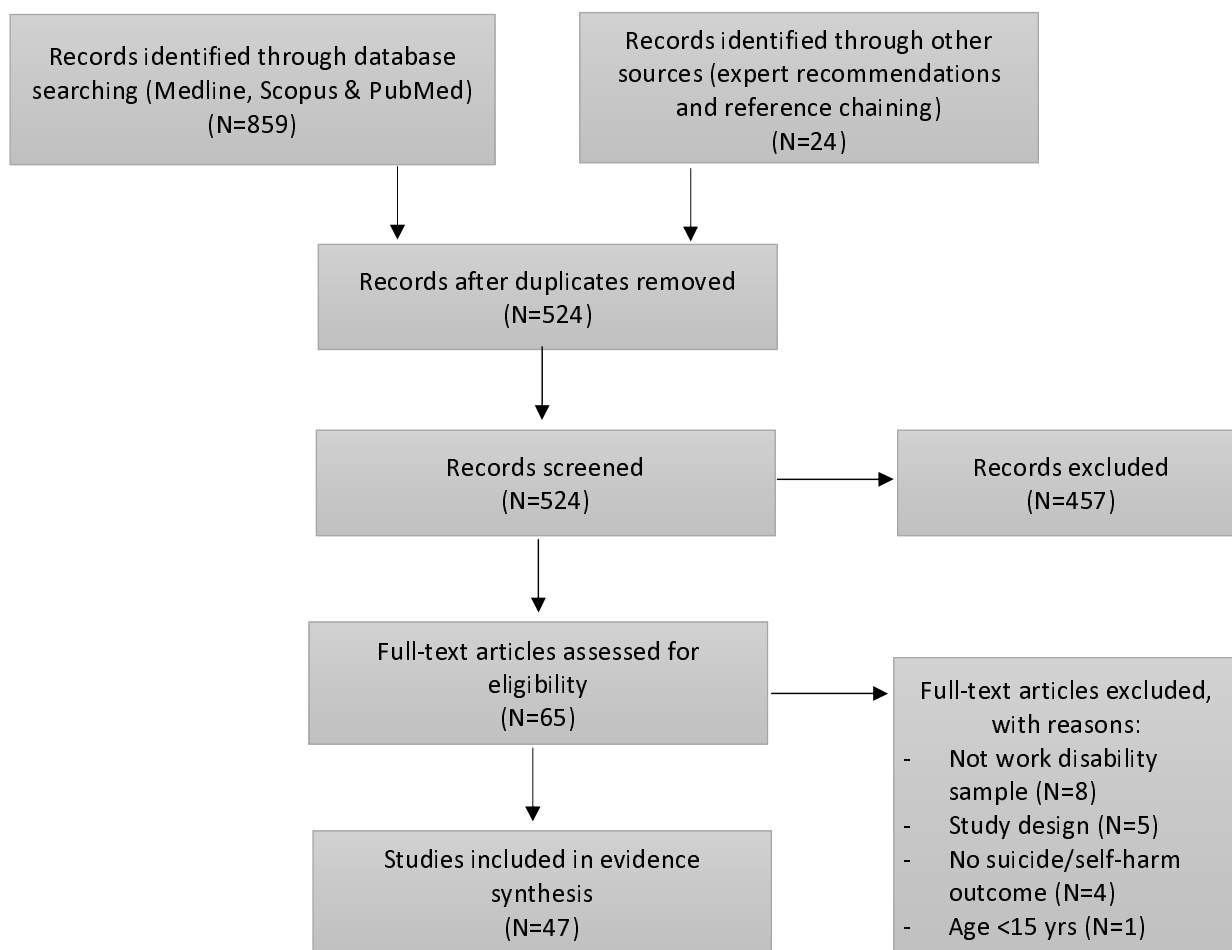

Source: https://medrxiv.org/content/10.1101/2022.01.20.22269619v1.full.pdf
